# Supplementary material
Source: publisher figshare collection journal article supplement (https://tandf.figshare.com/ndownloader/files/39744924)
Supplement: Supplementary file 1 [file 39744924]

## Sheet: Plate Motion
Table S1. Africa and Arabia plate motion relative to stable Eurasia plate (exported from G-Plates)
Seed Point: Arabia Promontory (35.916992°N, 40.249054°E)
Source: Seton et al. (2012)
	Time (Ma)	Latitude	Longitude	Stage Distance (km)	Cumulative Distance (km)		Convergence Rate (km/Myr)	Midpoint of timespan for convergence rate calculation
	65	24.656	36.1718	0	0		--
	60	25.2907	36.7476	91.4	91.4		18.28	62.5
	55	26.1499	37.5489	124.8	216.2		24.96	57.5
	50	26.8418	38.1158	95.4	311.6		19.08	52.5
	45	27.3818	38.4045	66.5	378.1		13.3	47.5
	40	28.253	38.9564	111	489.1		22.2	42.5
	35	29.3605	39.4288	131.5	620.6		26.3	37.5
	30	30.2537	39.8071	105.8	726.4		21.16	32.5
	25	31.0146	40.1312	90.1	816.5		18.02	27.5
	20	31.8454	40.4822	98.2	914.7		19.64	22.5
	15	32.8718	40.6545	115.3	1030		23.06	17.5
	10	33.9044	40.7481	115.2	1145.2		23.04	12.5
	5	34.9135	40.5101	114.3	1259.5		22.86	7.5
	0	35.917	40.2491	114.1	1373.6		22.82	2.5
Seed Point: Arabia Promontory (35.916992°N, 40.249054°E)
Source: Matthews et al. (2016)
	Time (Ma)	Latitude	Longitude	Stage Distance (km)	Cumulative Distance (km)		Convergence Rate (km/Myr)	Midpoint of timespan for convergence rate calculation
	65	25.4495	36.6175	0	0		--
	60	25.7048	36.806	34.1	34.1		6.82	62.5
	55	26.0342	37.057	44.4	78.5		8.88	57.5
	50	26.6927	37.5907	90.5	169		18.1	52.5
	45	27.4702	38.1362	101.9	270.9		20.38	47.5
	40	28.3383	38.6847	180.2	451.1		36.04	42.5
	35	29.442	39.1527	133.2	584.3		26.64	37.5
	30	30.3322	39.5274	105.4	689.7		21.08	32.5
	25	31.0905	39.8483	89.7	779.4		17.94	27.5
	20	31.8538	40.1681	90.1	869.5		18.02	22.5
	15	32.8753	40.3049	114.31	983.81		22.862	17.5
	10	33.875	40.4079	111.6	1095.41		22.32	12.5
	5	34.92	40.2682	116.9	1212.31		23.38	7.5
	0	35.917	40.2491	110.9	1323.21		22.18	2.5
Seed Point: Arabia North (35.5°N, 46.0°E)
Source: McQuarrie et al. (2003)
	Time (Ma)	Latitude	Longitude	Stage Distance (km)	Cumulative Distance (km)		Convergence Rate (km/Myr)	Midpoint of timespan for convergence rate calculation
	56.1	23.2	40.6	0	0
	47.1	24.4	41.7	174.1	174.1		19.3444	51.6
	43.2	25.2	42	94	268.1		24.1026	45.2
	39.3	26.3	43.2	171.5	439.6		43.9744	41.3
	33.3	28.5	44.4	271.8	711.4		45.3	36.3
	19.6	32	46	418.4	1129.8		30.5401	26.5
	10.6	33.7	46.1	189.3	1319.1		21.0333	15.1
	0	35.5	46	200.4	1519.5		18.9057	5.3
Seed Point: SE Zagros (27.59341°N, 55.569763°E)
Source: Seton et al. (2012)
	Time (Ma)	Latitude	Longitude	Stage Distance (km)	Cumulative Distance (km)		Convergence Rate (km/Myr)	Midpoint of timespan for convergence rate calculation
	65	13.9168	47.935	0	0		--
	60	14.6369	48.6485	111	111		22.2	62.5
	55	15.6014	49.6278	150.2	261.2		30.04	57.5
	50	16.4438	50.4081	125.4	386.6		25.08	52.5
	45	17.1061	50.8685	88.5	475.1		17.7	47.5
	40	18.0969	51.6213	136	611.1		27.2	42.5
	35	19.354	52.3523	159.6	770.7		31.92	37.5
	30	20.3641	52.9405	128.1	898.8		25.62	32.5
	25	21.2214	53.4441	108.8	1007.6		21.76	27.5
	20	22.167	54.0046	120	1127.6		24	22.5
	15	23.4435	54.5446	152.3	1279.9		30.46	17.5
	10	24.754	55.0365	154	1433.9		30.8	12.5
	5	26.1716	55.3125	160	1593.9		32	7.5
	0	27.5934	55.5698	160.1	1754		32.02	2.5
Seed Point: SE Zagros (27.59341°N, 55.569763°E)
Source: Matthews et al. (2016)
	Time (Ma)	Latitude	Longitude	Stage Distance (km)	Cumulative Distance (km)		Convergence Rate (km/Myr)	Midpoint of timespan for convergence rate calculation
	65	14.5456	48.2616	0	0		--
	60	14.8434	48.5159	43	43		8.6	62.5
	55	15.2338	48.8589	56.9	99.9		11.38	57.5
	50	16.0411	49.6058	120.2	220.1		24.04	52.5
	45	16.95	50.3568	128.9	349		25.78	47.5
	40	17.9369	51.1082	135.6	484.6		27.12	42.5
	35	19.1891	51.8371	159	643.6		31.8	37.5
	30	20.1955	52.4233	127.6	771.2		25.52	32.5
	25	21.0499	52.9251	108.4	879.6		21.68	27.5
	20	21.9045	53.4254	108.2	987.8		21.64	22.5
	15	23.2202	53.979	157	1144.8		31.4	17.5
	10	24.6232	54.5989	168.2	1313		33.64	12.5
	5	26.1596	55.0554	176.9	1489.9		35.38	7.5
	0	27.5934	55.5698	167.4	1657.3		33.48	2.5
Seed Point: Africa (30.069071°N, 29.601002°E)
Source: Seton et al. (2012)
	Time (Ma)	Latitude	Longitude	Stage Distance (km)	Cumulative Distance (km)		Convergence Rate (km/Myr)	Midpoint of timespan for convergence rate calculation
	65	21.2182	25.4378	0	0
	60	21.7519	26.0052	83.5	83.5		16.7	62.5
	55	22.4847	26.7905	114.8	198.3		22.96	57.5
	50	23.0176	27.3715	84	282.3		16.8	52.5
	45	23.4309	27.6738	55.4	337.7		11.08	47.5
	40	24.1666	28.2151	98.6	436.3		19.72	42.5
	35	25.1055	28.6723	114.2	550.5		22.84	37.5
	30	25.867	29.0359	92.2	642.7		18.44	32.5
	25	26.5192	29.3455	78.8	721.5		15.76	27.5
	20	27.1804	29.6509	79.5	801		15.9	22.5
	15	27.5963	29.5871	46.7	847.7		9.34	17.5
	10	28.0278	29.5421	48.2	895.9		9.64	12.5
	5	28.5001	29.5695	52.6	948.5		10.52	7.5
	0	28.9791	29.601	53.3	1001.8		10.66	2.5
Seed Point: Africa (30.069071°N, 29.601002°E)
Source: Matthews et al. (2016)
	Time (Ma)	Latitude	Longitude	Stage Distance (km)	Cumulative Distance (km)		Convergence Rate (km/Myr)	Midpoint of timespan for convergence rate calculation
	65	21.8198	26.1265	0	0
	60	22.028	26.3159	30.3	30.3		6.06	62.5
	55	22.2911	26.5706	39.3	69.6		7.86	57.5
	50	22.7951	27.1237	79.8	149.4		15.96	52.5
	45	23.4309	27.6738	90.4	239.8		18.08	47.5
	40	24.1666	28.2151	98.6	338.4		19.72	42.5
	35	25.1055	28.6723	114.2	452.6		22.84	37.5
	30	25.867	29.0359	92.2	544.8		18.44	32.5
	25	26.5192	29.3455	78.8	623.6		15.76	27.5
	20	27.1804	29.6509	79.5	703.1		15.9	22.5
	15	27.5963	29.5871	46.7	749.8		9.34	17.5
	10	28.0278	29.5421	48.2	798		9.64	12.5
	5	28.5001	29.5695	52.6	850.6		10.52	7.5
	0	28.9791	29.601	53.3	903.9		10.66	2.5
